# Supplementary material for: Chain Formation during Hydrogen Loss and Reconstruction in Non-Planar Polyaromatic Hydrocarbons
Source: Preprints.org preprint supplement (doi:10.20944/preprints202205.0206.v1), 2022-05-16
Supplement: Supplementary file 1 [file supplementary]

**Supplementary Materials**

Chain and fullerene formation during hydrogen loss and reconstruction in
non-planar polyaromatic hydrocarbons

## Y. Tanuma1,2, P. Dunk3, T. Maekawa1,4, C. P. Ewels2*

*1 Graduate School of Interdisciplinary New Science, Toyo University, Kujirai 2100, Kawagoe, 350-8585, Japan.*

2 Institut des Materiaux de Nantes Jean Rouxel (IMN), UMR6502 CNRS, Universite de Nantes 2 Rue de la Houssiniere, BP32229, 44322 Nantes, France.

3 Ion Cyclotron Resonance Program, National High Magnetic Field Laboratory, Florida State University, Tallahassee, FL 32310, USA.

4 *Bio-Nano Electronics Research Centre, Toyo University, Kujirai 2100, Kawagoe, 350-8585, Japan.*

** Corresponding Author chris.ewels@cnrs-imn.fr*


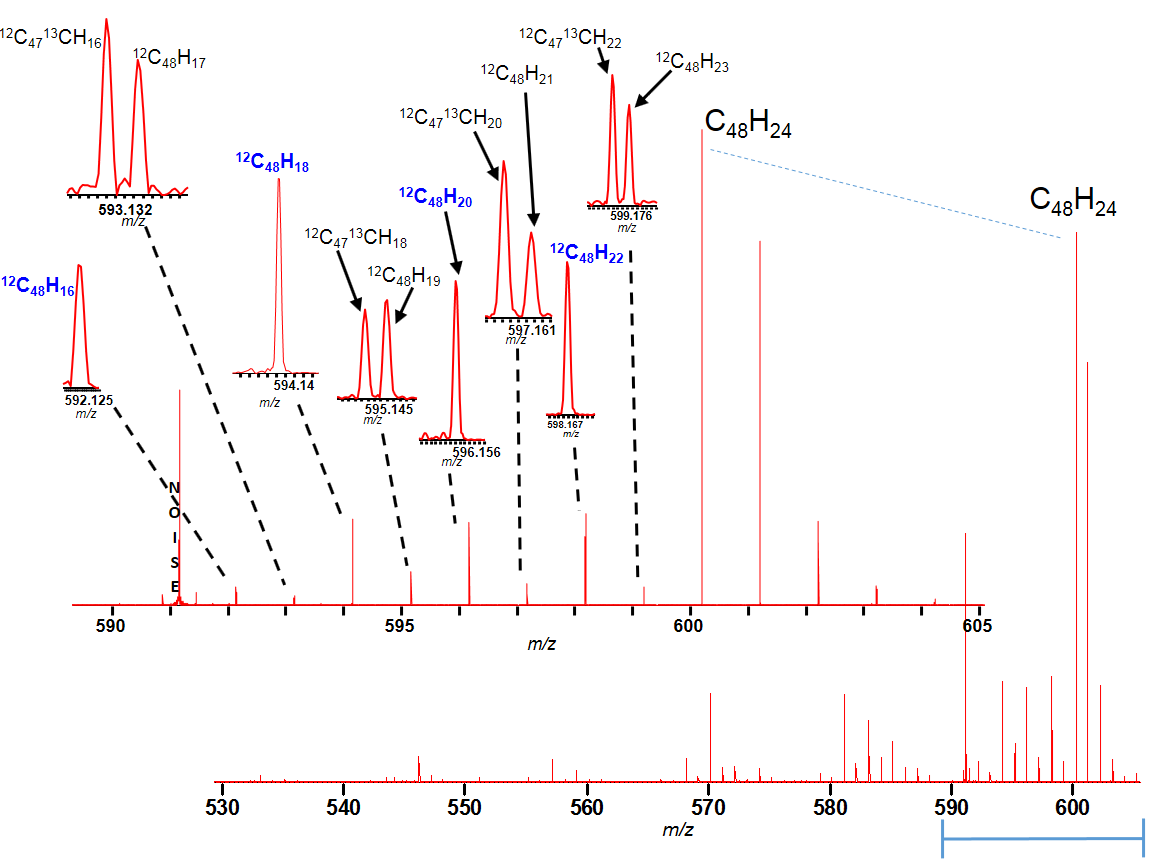


**Figure S1:** Mass spectrum expansion of the dissociation spectrum of C48H24, demonstrating the extremely clear picture of products that are formed and detected. Notably the resolution allows us to distinguish between carbon isotope peaks and genuine hydrogen loss peaks, demonstrating that 2H-loss is strongly preferred over odd-number H-loss.


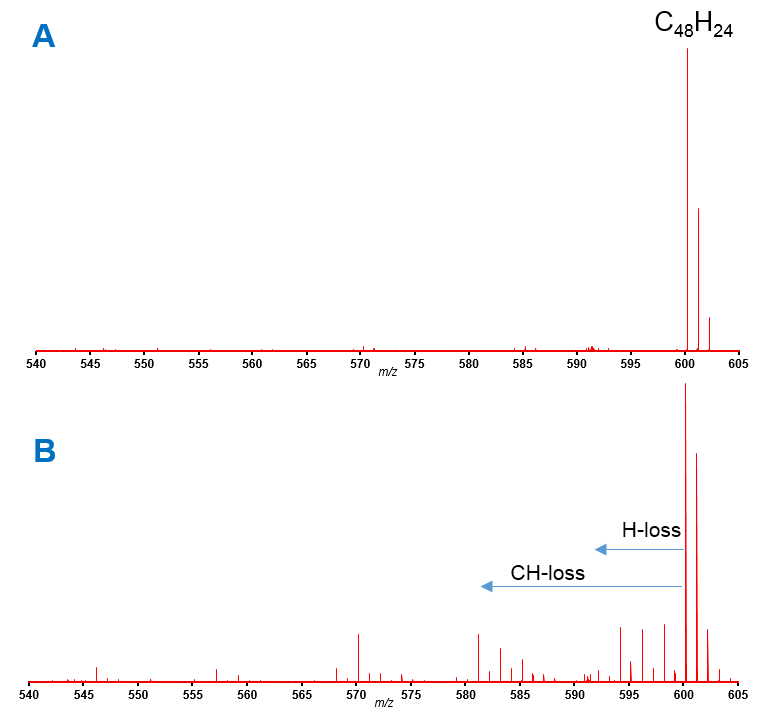
**Figure S2:** FT-ICR mass spectra of laser desorbed C48H24 nanobelts,
(a) SWIFT-isolated before collisional dissociation in the gas phase in an ultrahigh vacuum, and
(b) after collision-induced dissociation. Fragments corresponding to loss of H-, C2 and CH- are clearly observable.


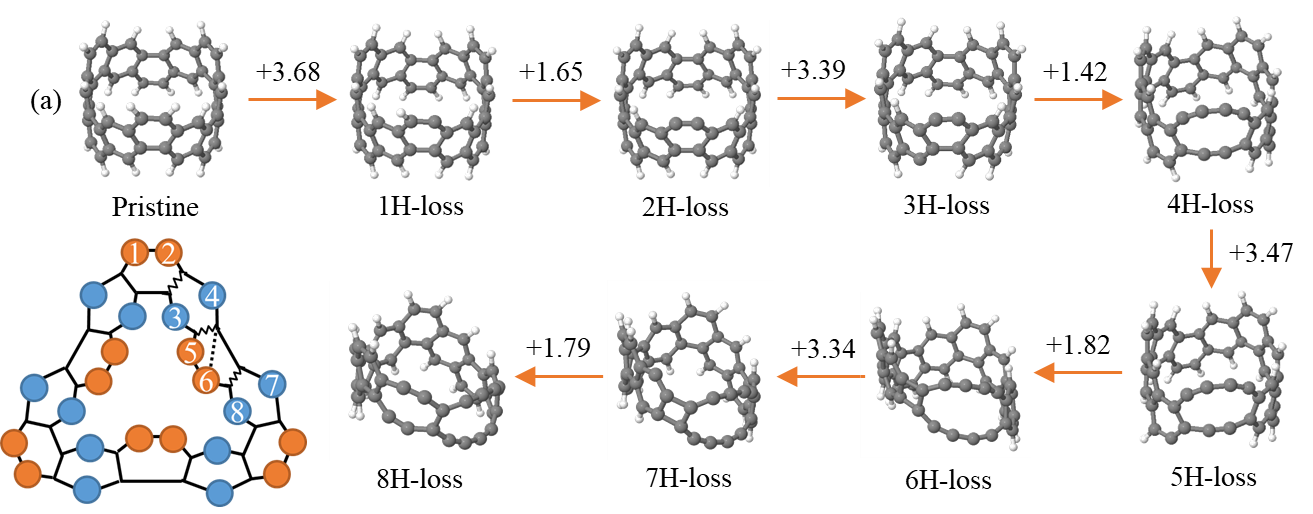


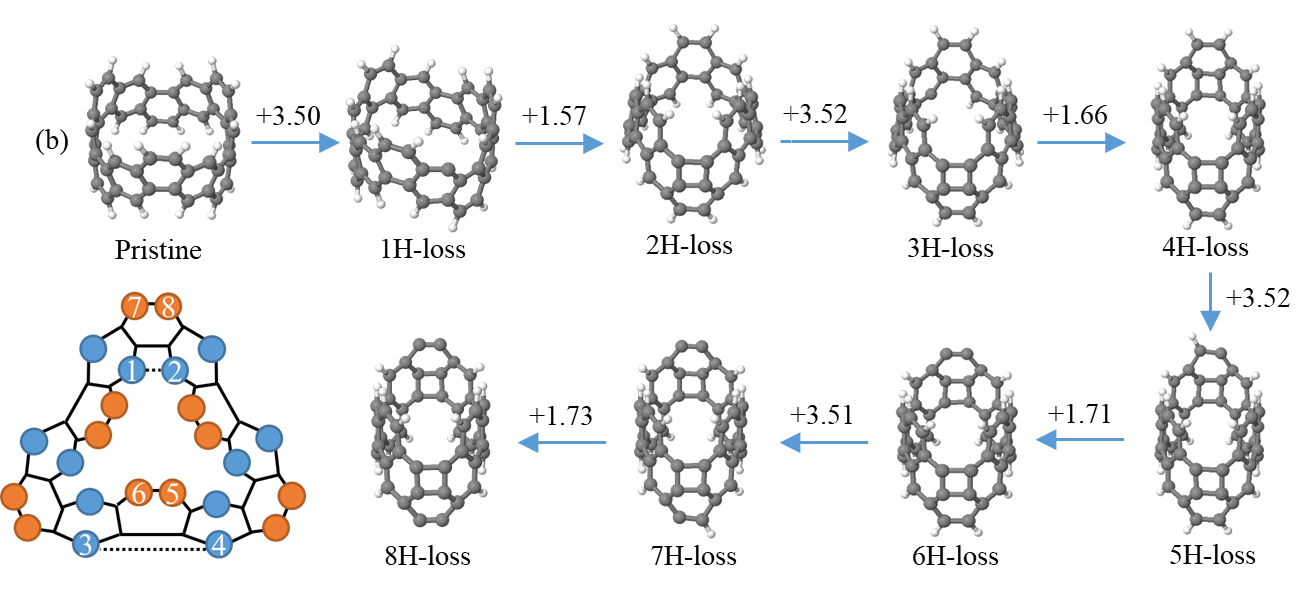


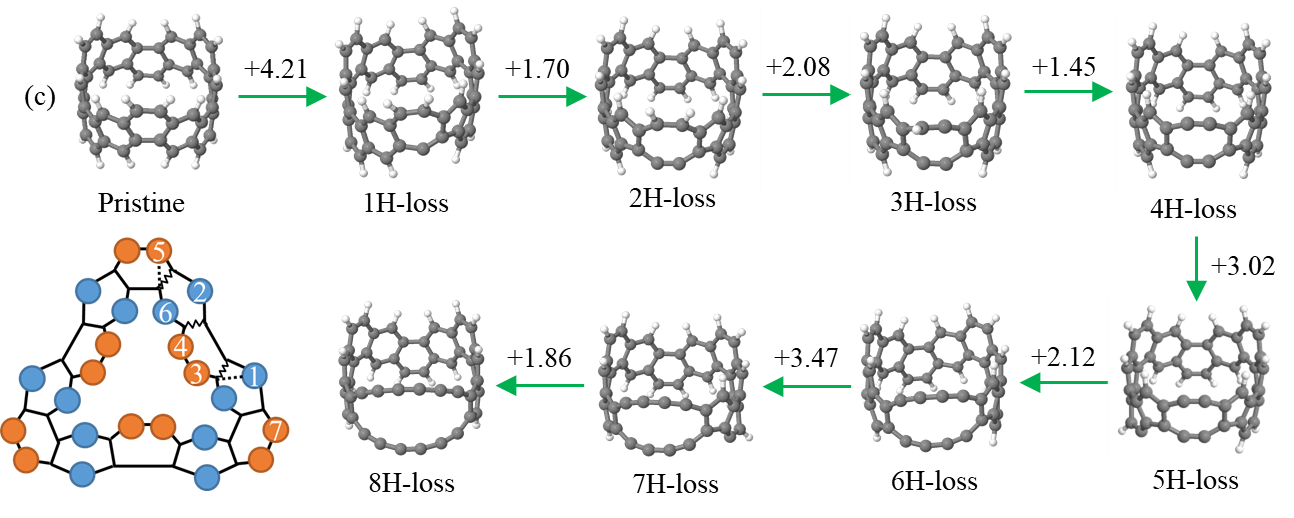


**Figure S3:** Hydrogen-loss sequence under a charge +1 state started with a hydrogen bound to (a) “exterior” of a carbon edge, (b) “interior” of a carbon edge, and (c) “exterior” with additional C-C bond rotation to given terminating pentagons. Numbers in the coloured Schlegel diagrams (2D projections of the nanorings) represent the order of removed hydrogen atoms in each sequence. Values on arrows indicate energy difference (eV) between two structures. Dotted lines and zigzag lines in the Schlegel diagram show a new bond formed by removal of two adjacent hydrogen atoms and a broken bond by forming two carbon chains, respectively.
